# Supplementary figures and images for: Low temperature decoherence dynamics in molecular spin systems using the Lindblad master equation
Source: Royal Society of Chemistry journal article supplement (doi:10.1039/d4sc05627b), 2024-01-01

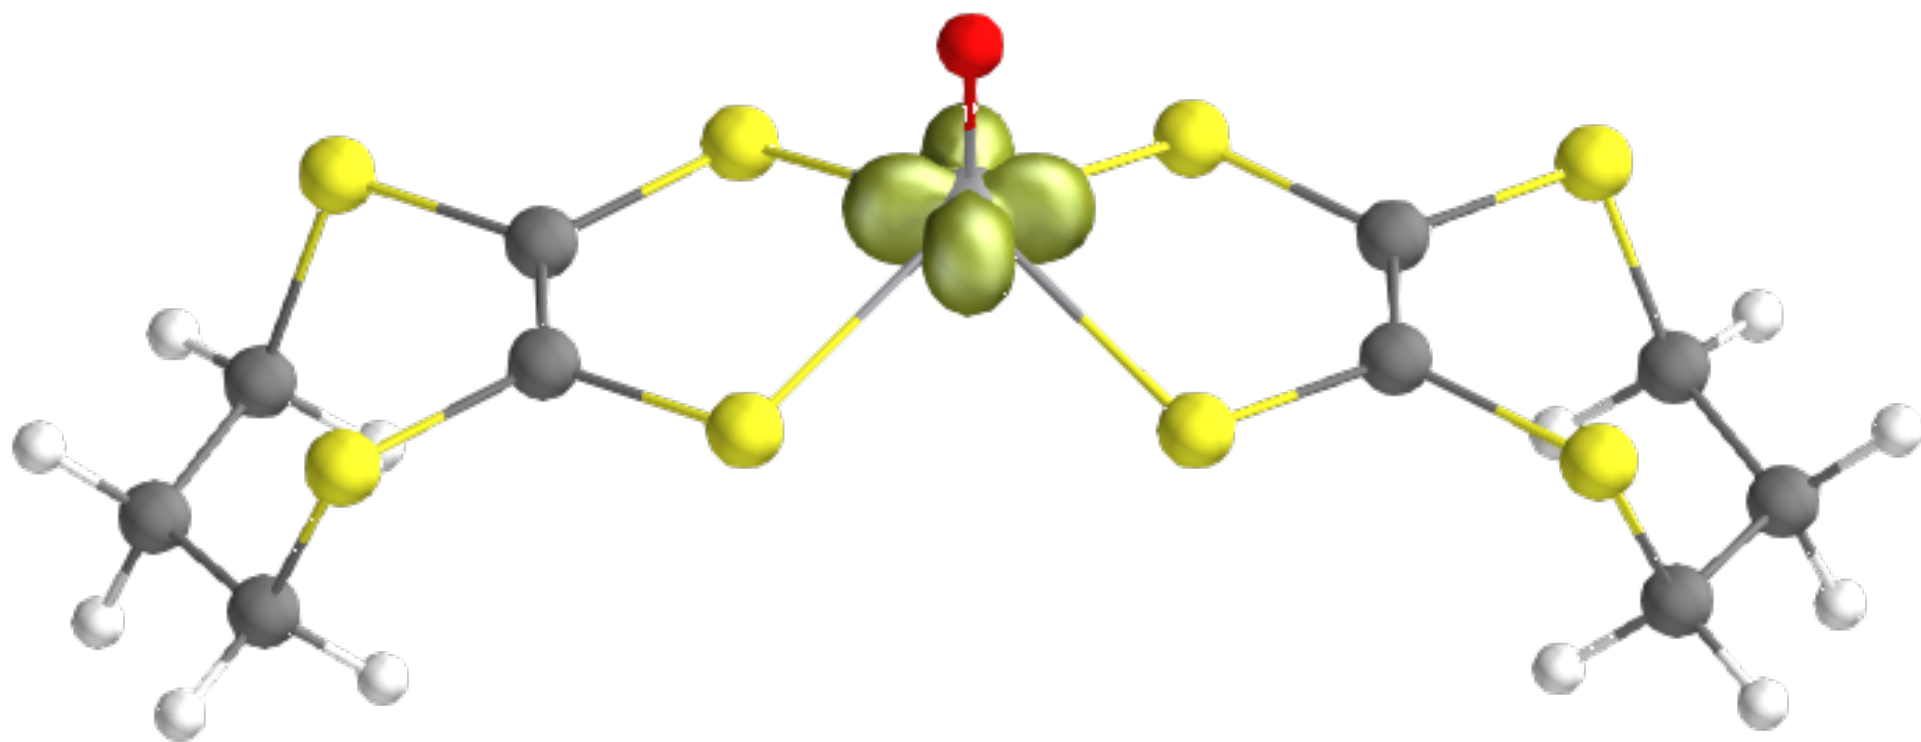

Supplement: d4sc05627b1.zip [file d4sc05627b1.zip]

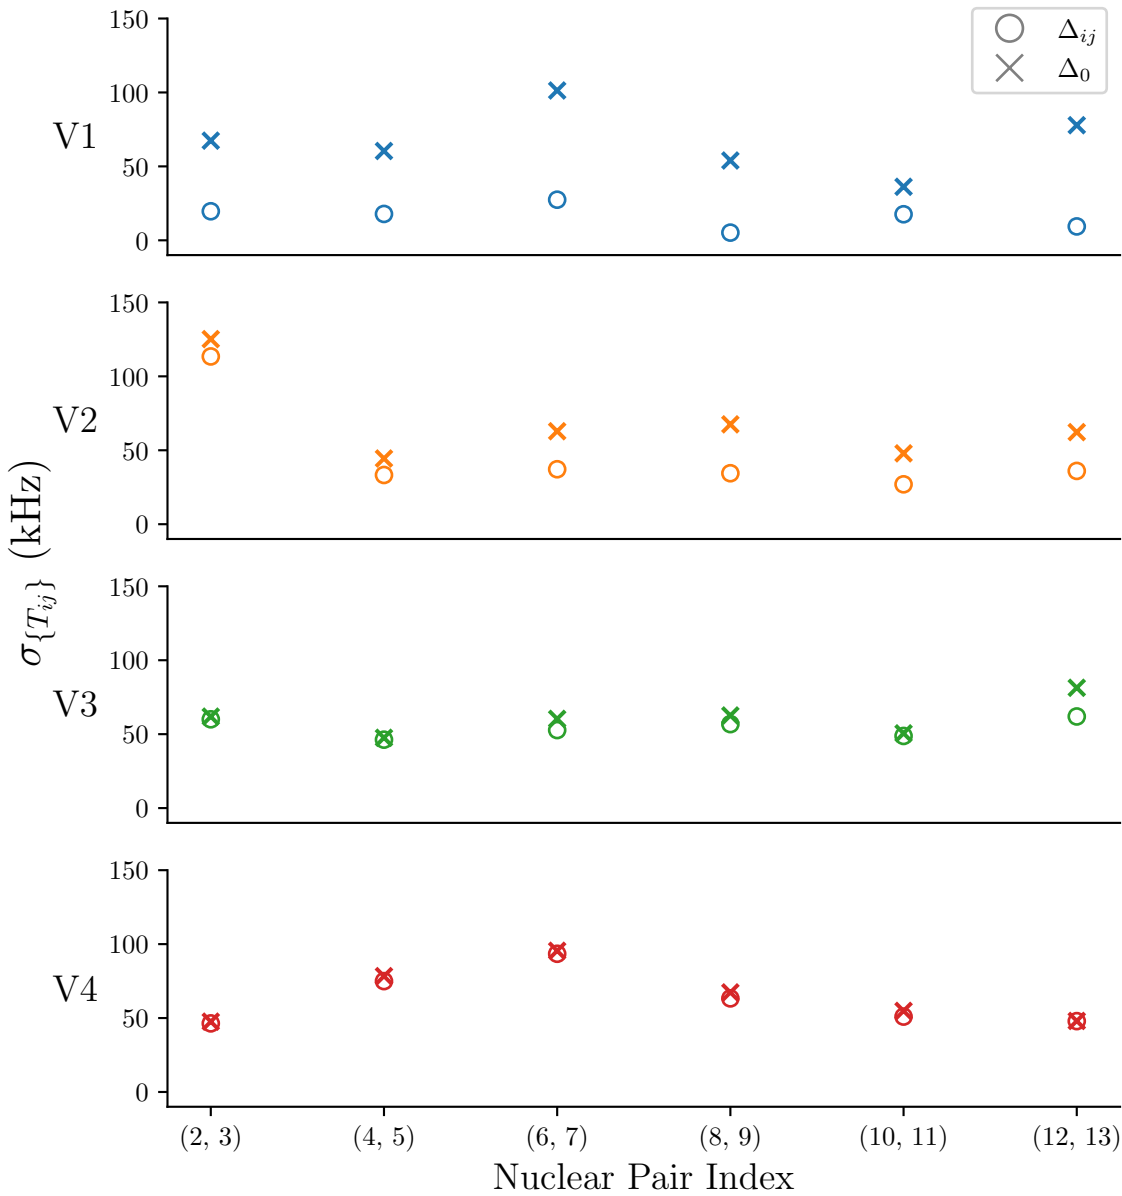

Supplement: d4sc05627b1.zip [file d4sc05627b1.zip]

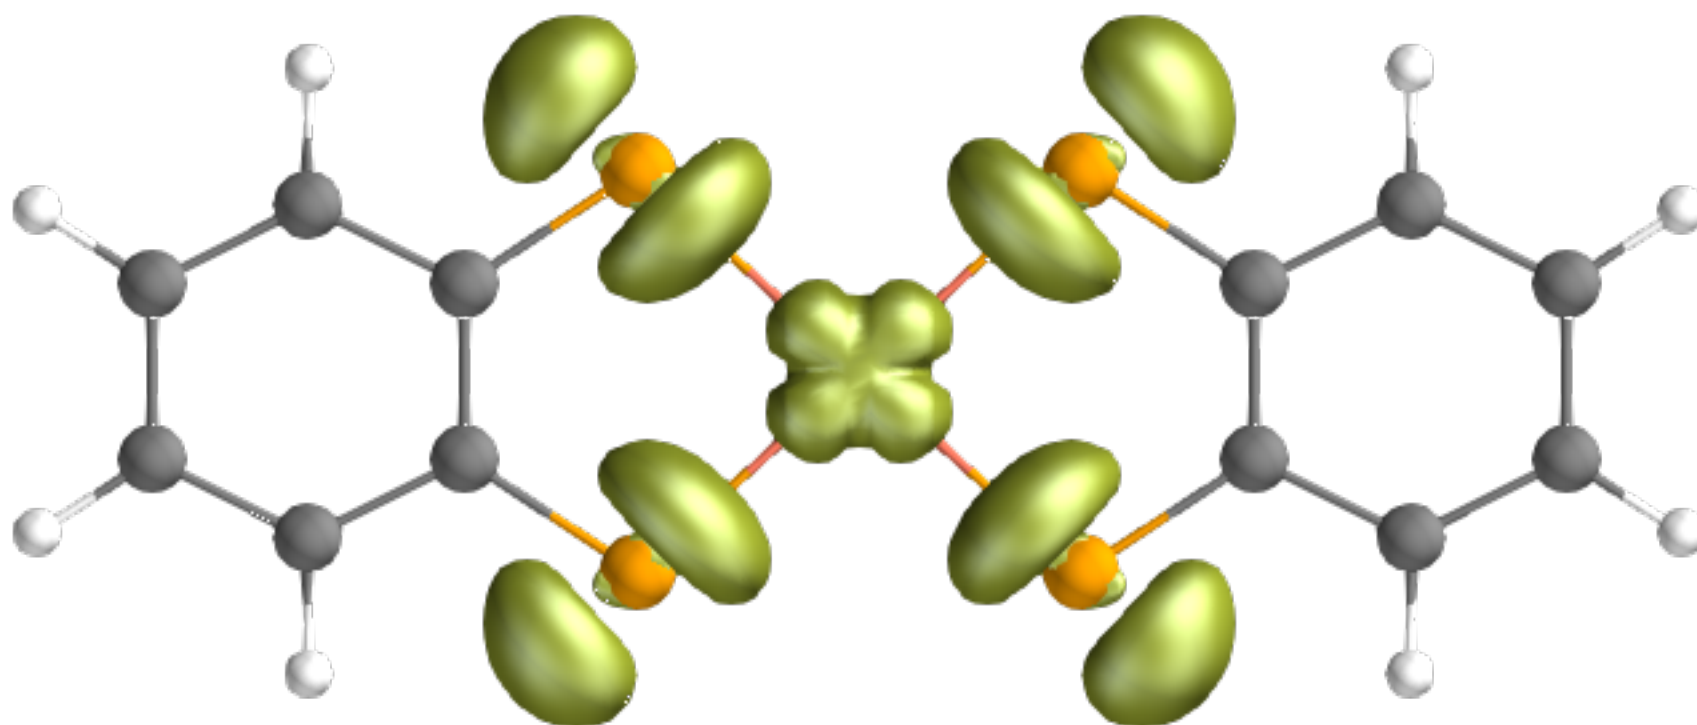

Supplement: d4sc05627b1.zip [file d4sc05627b1.zip]

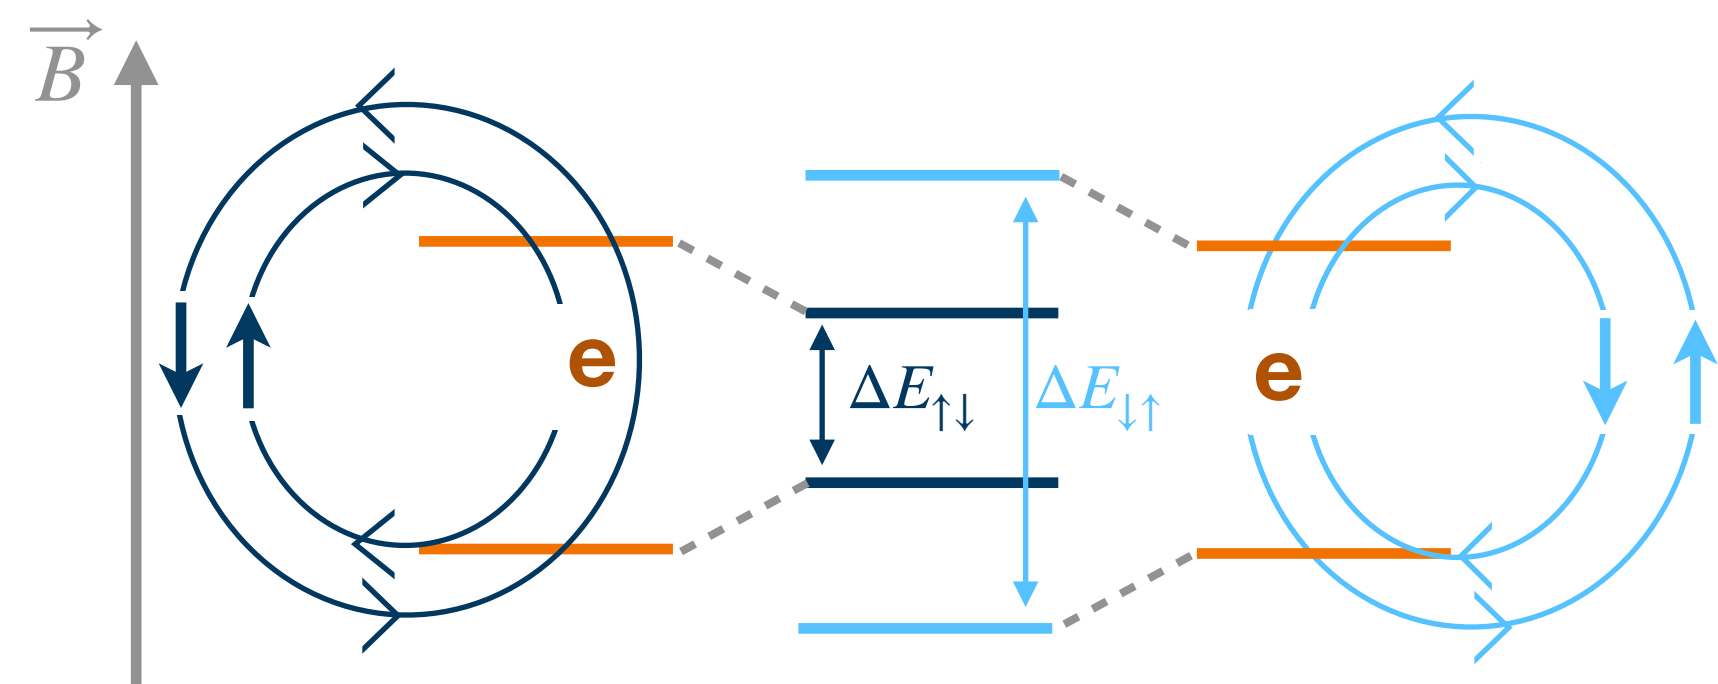

Supplement: d4sc05627b1.zip [file d4sc05627b1.zip]

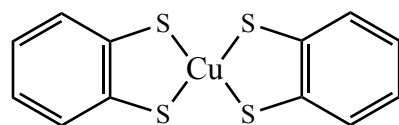

Supplement: d4sc05627b1.zip [file d4sc05627b1.zip]

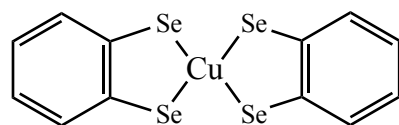

Supplement: d4sc05627b1.zip [file d4sc05627b1.zip]

**V1**

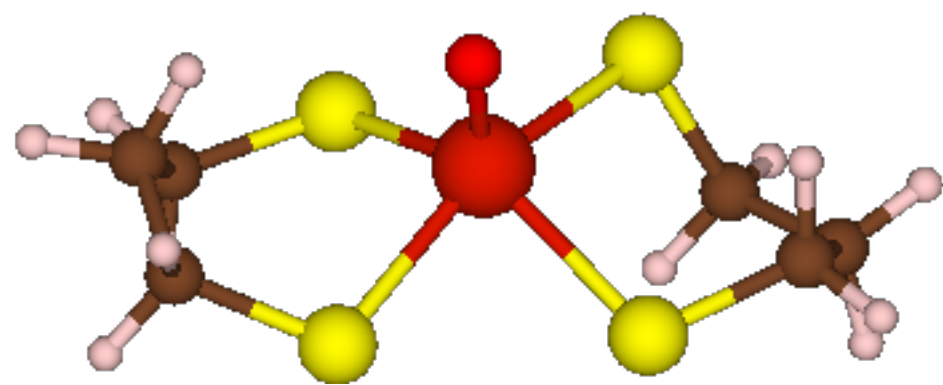

**V2**

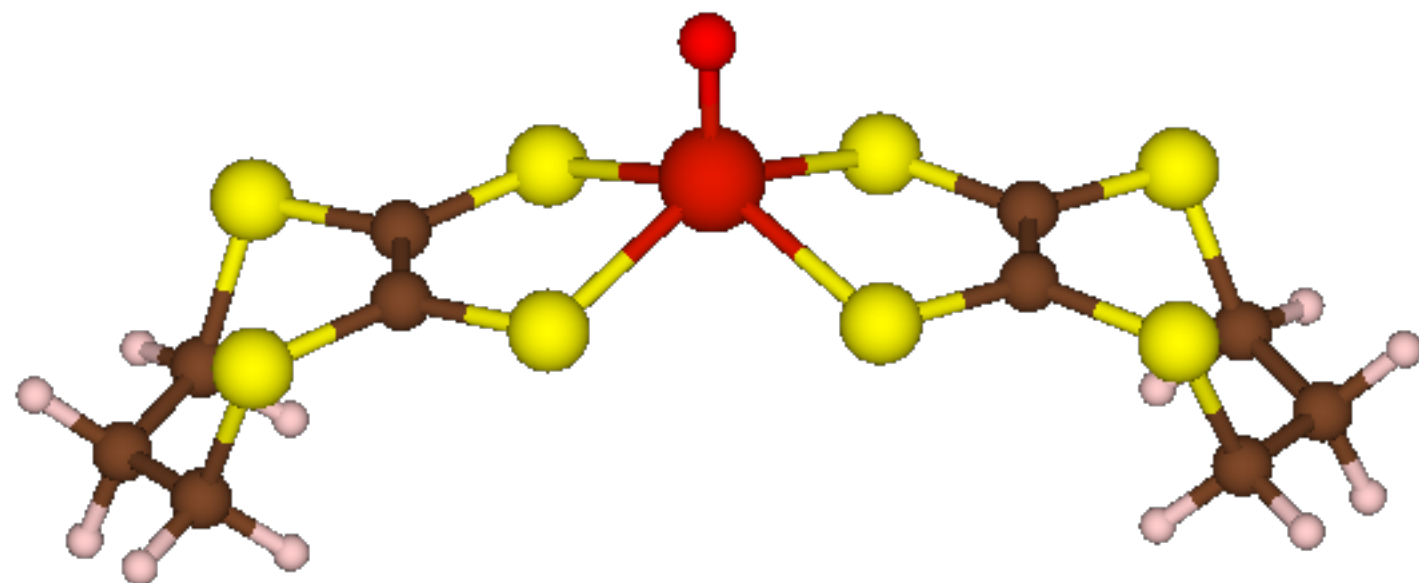

**V3**

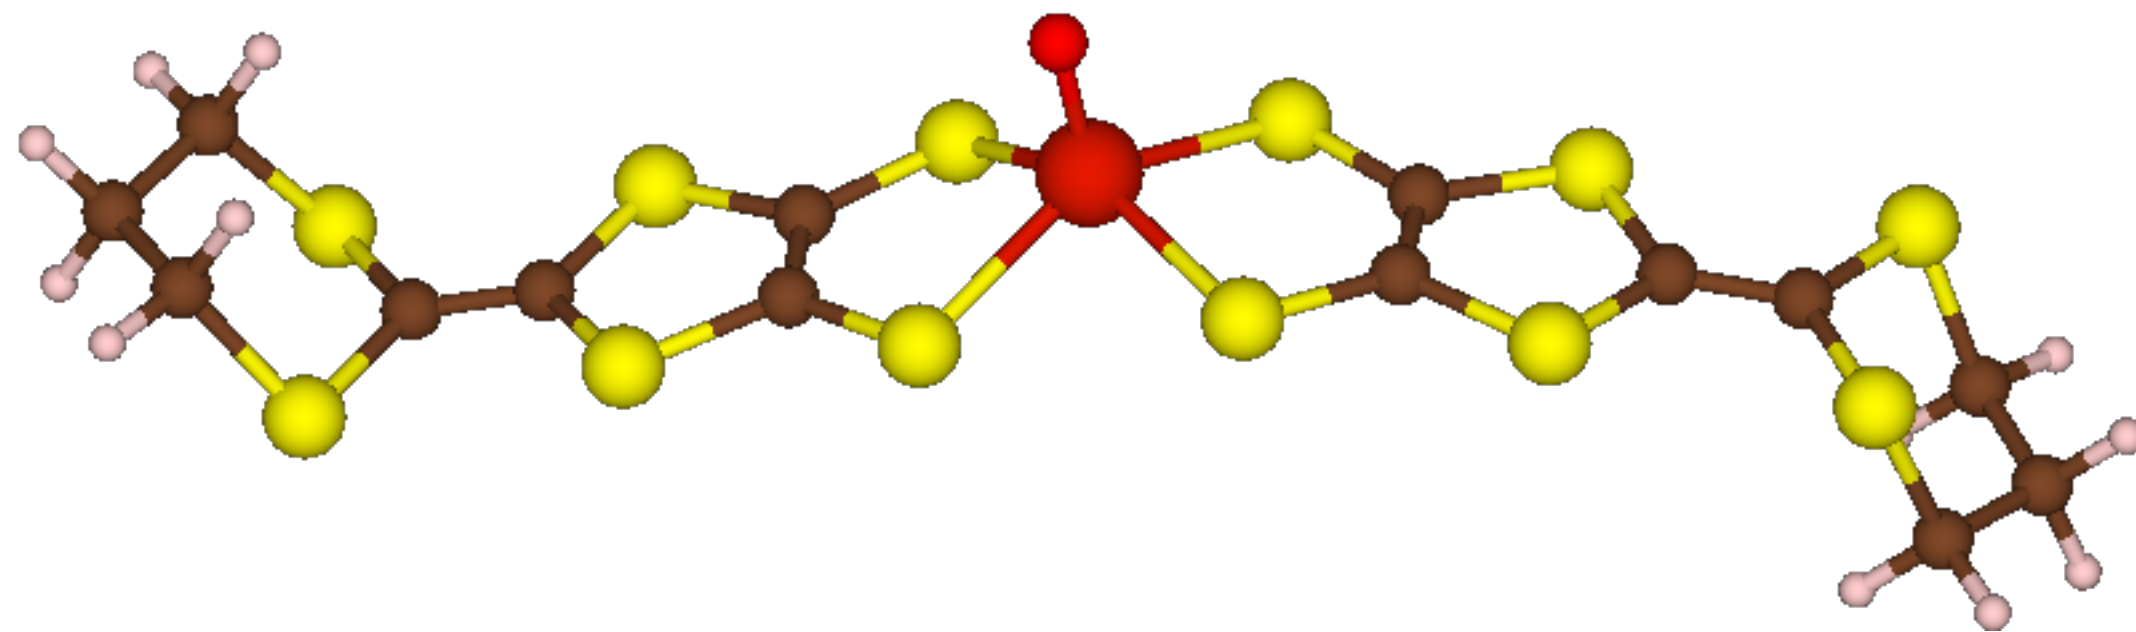

**V4**

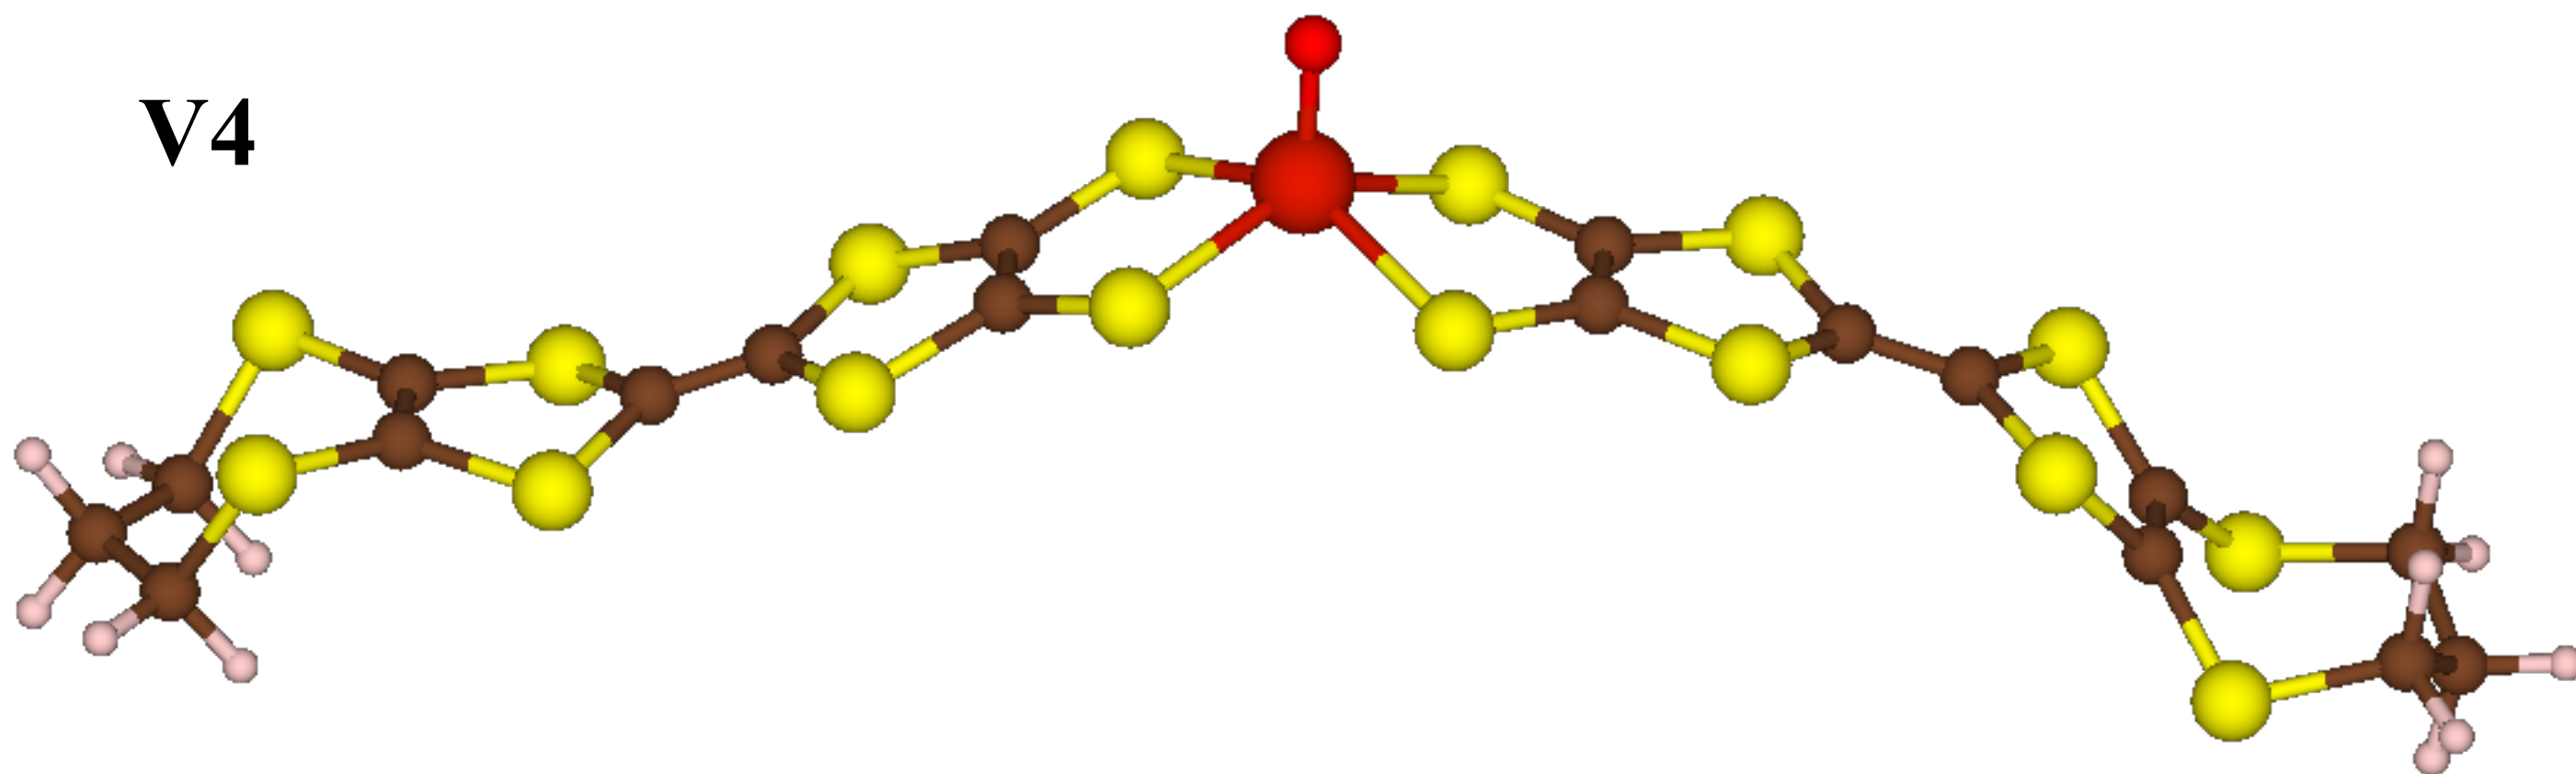

Supplement: d4sc05627b1.zip [file d4sc05627b1.zip]

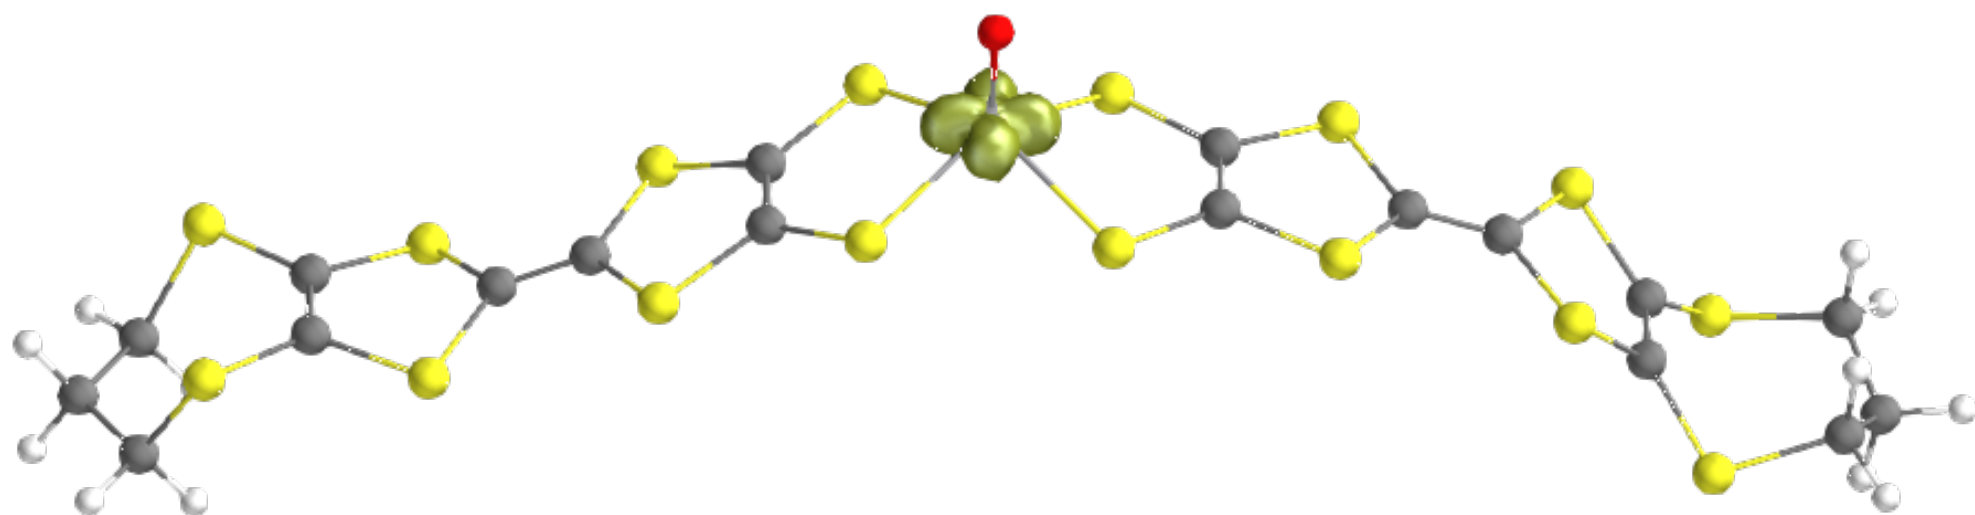

Supplement: d4sc05627b1.zip [file d4sc05627b1.zip]

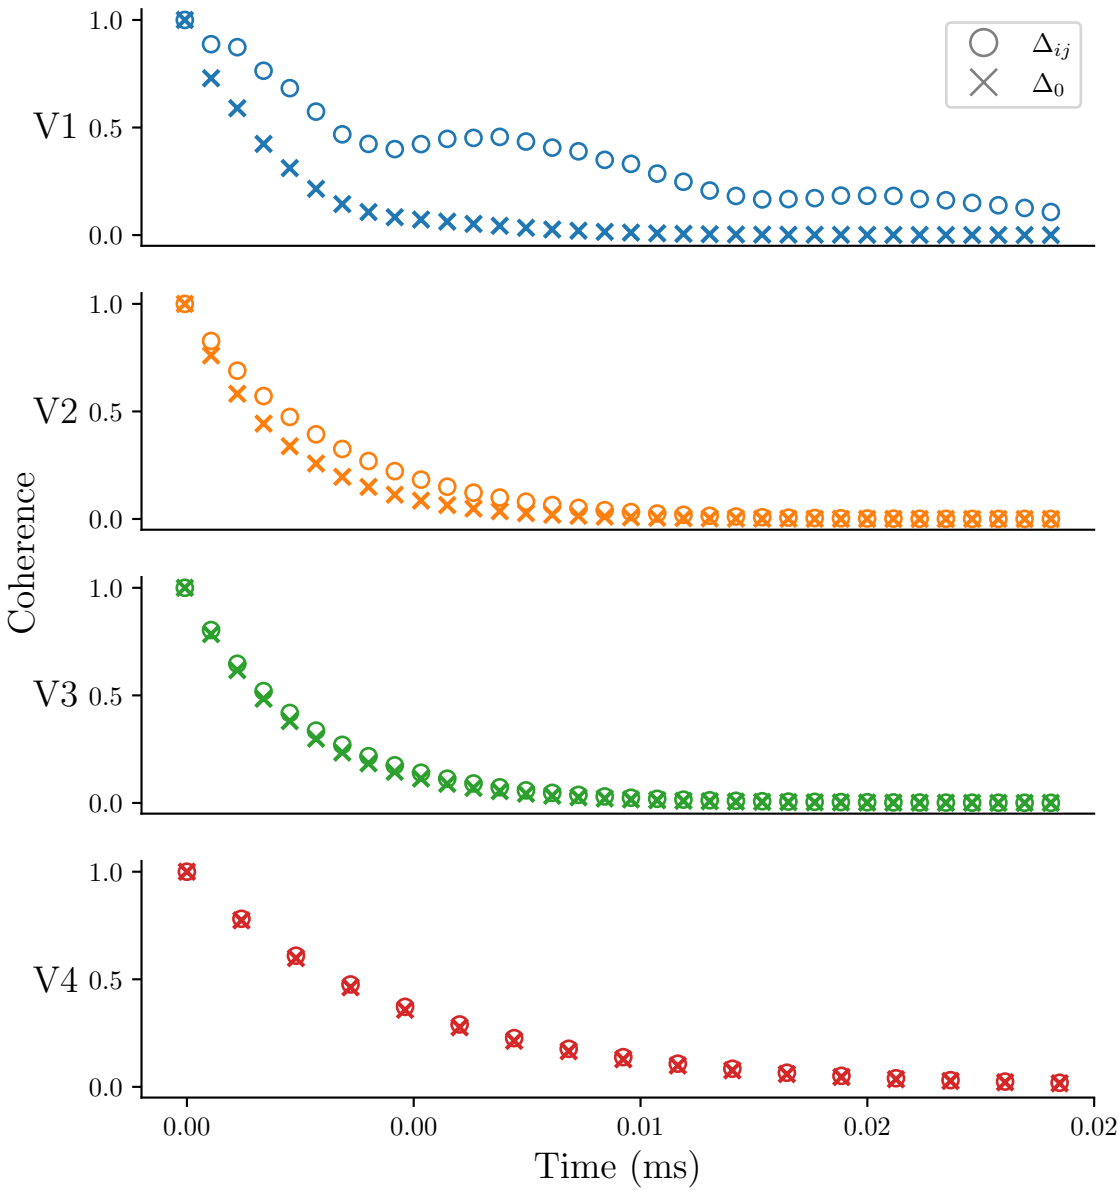

Supplement: d4sc05627b1.zip [file d4sc05627b1.zip]

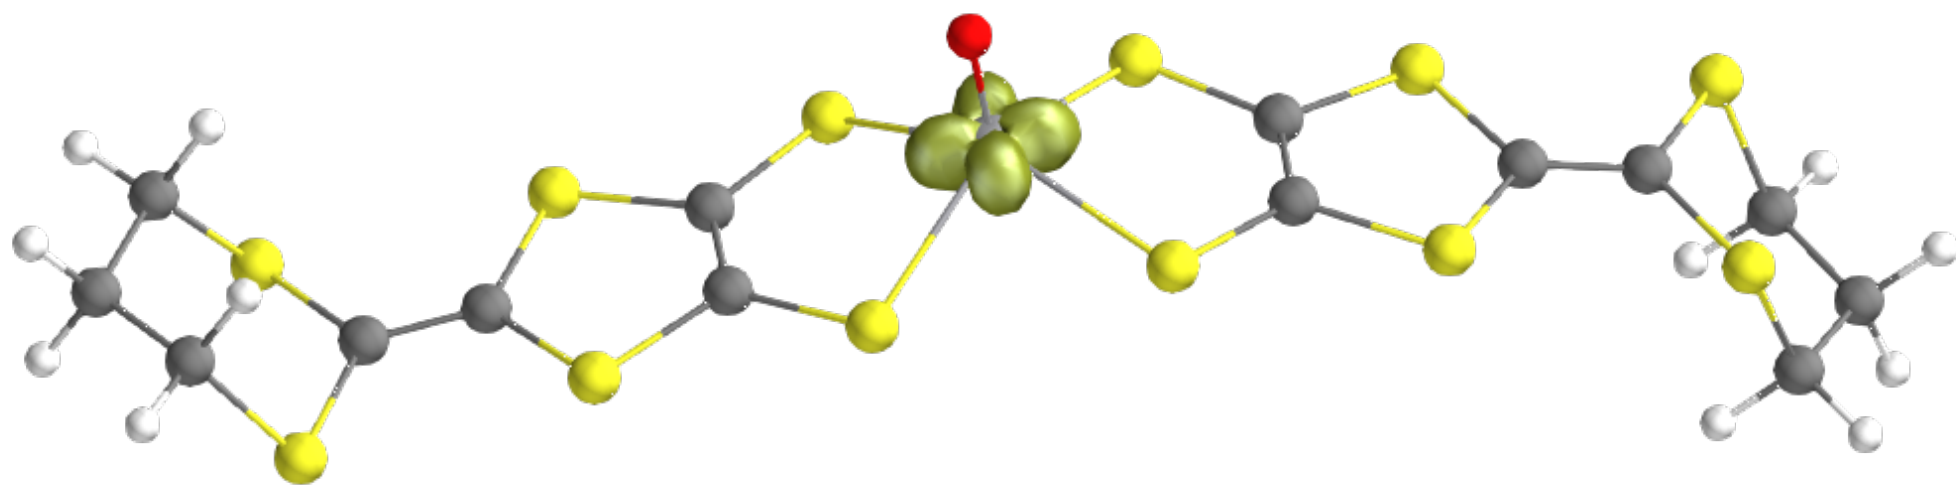

Supplement: d4sc05627b1.zip [file d4sc05627b1.zip]

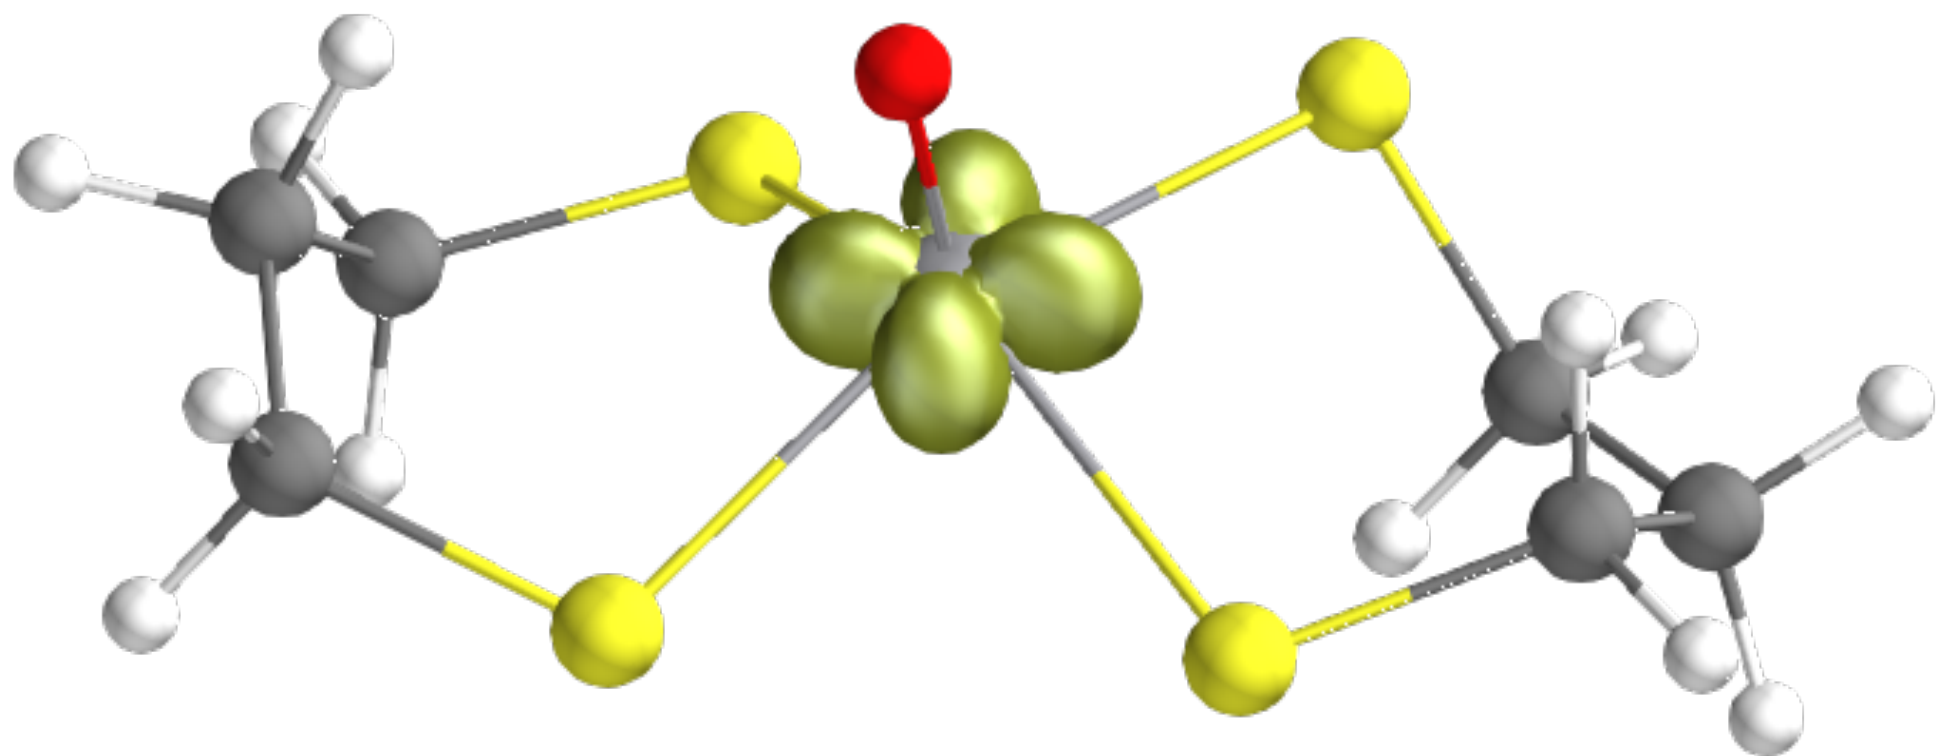

Supplement: d4sc05627b1.zip [file d4sc05627b1.zip]

Coherence

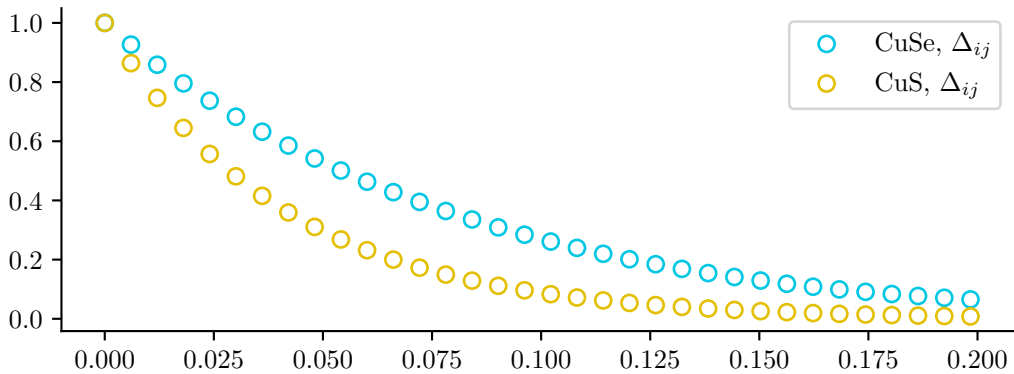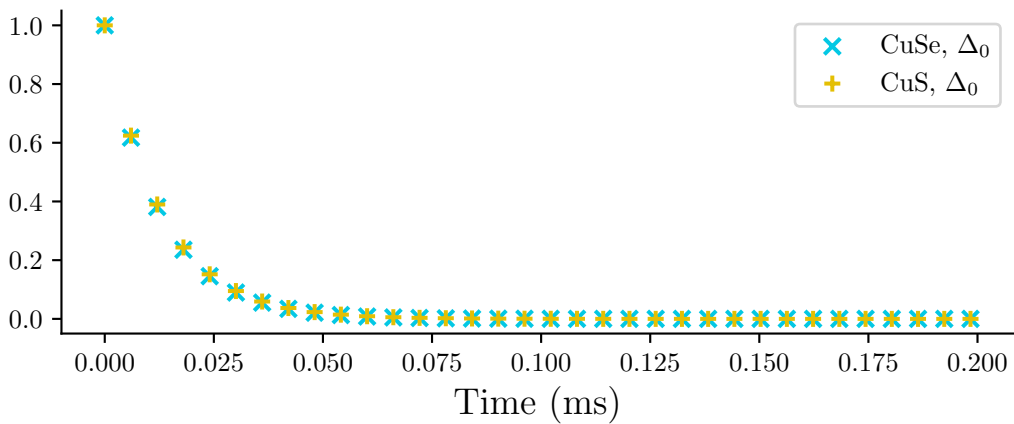

Supplement: d4sc05627b1.zip [file d4sc05627b1.zip]

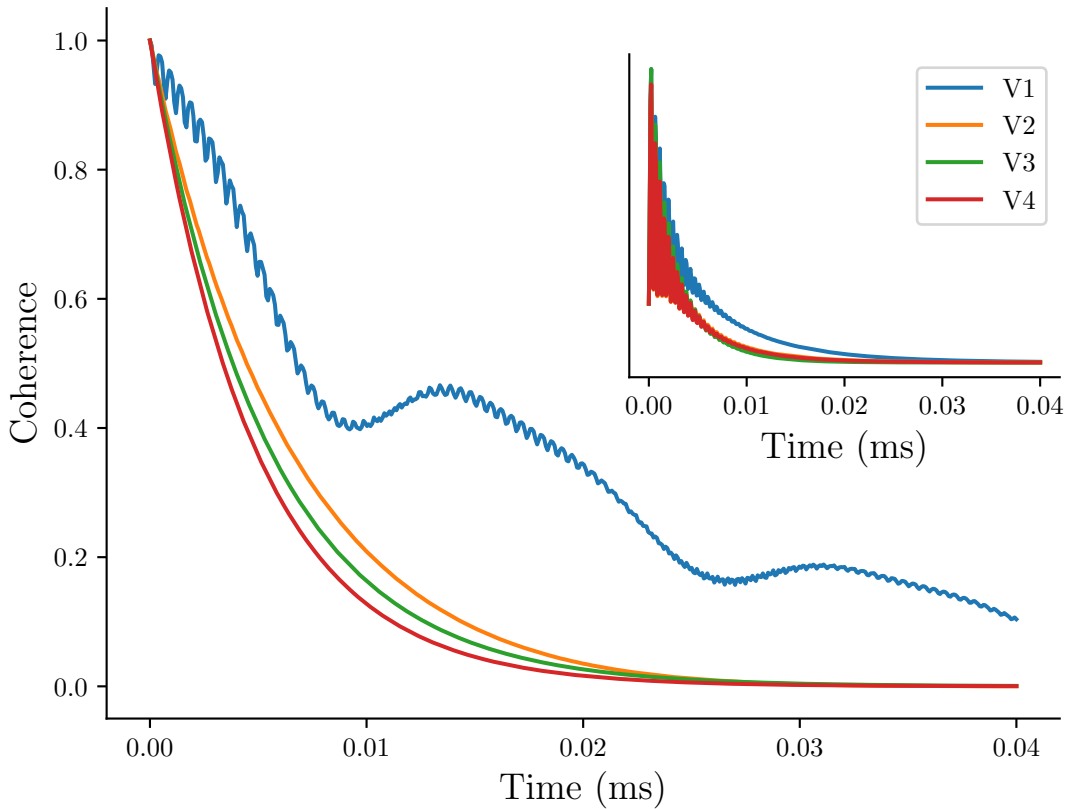

Supplement: d4sc05627b1.zip [file d4sc05627b1.zip]

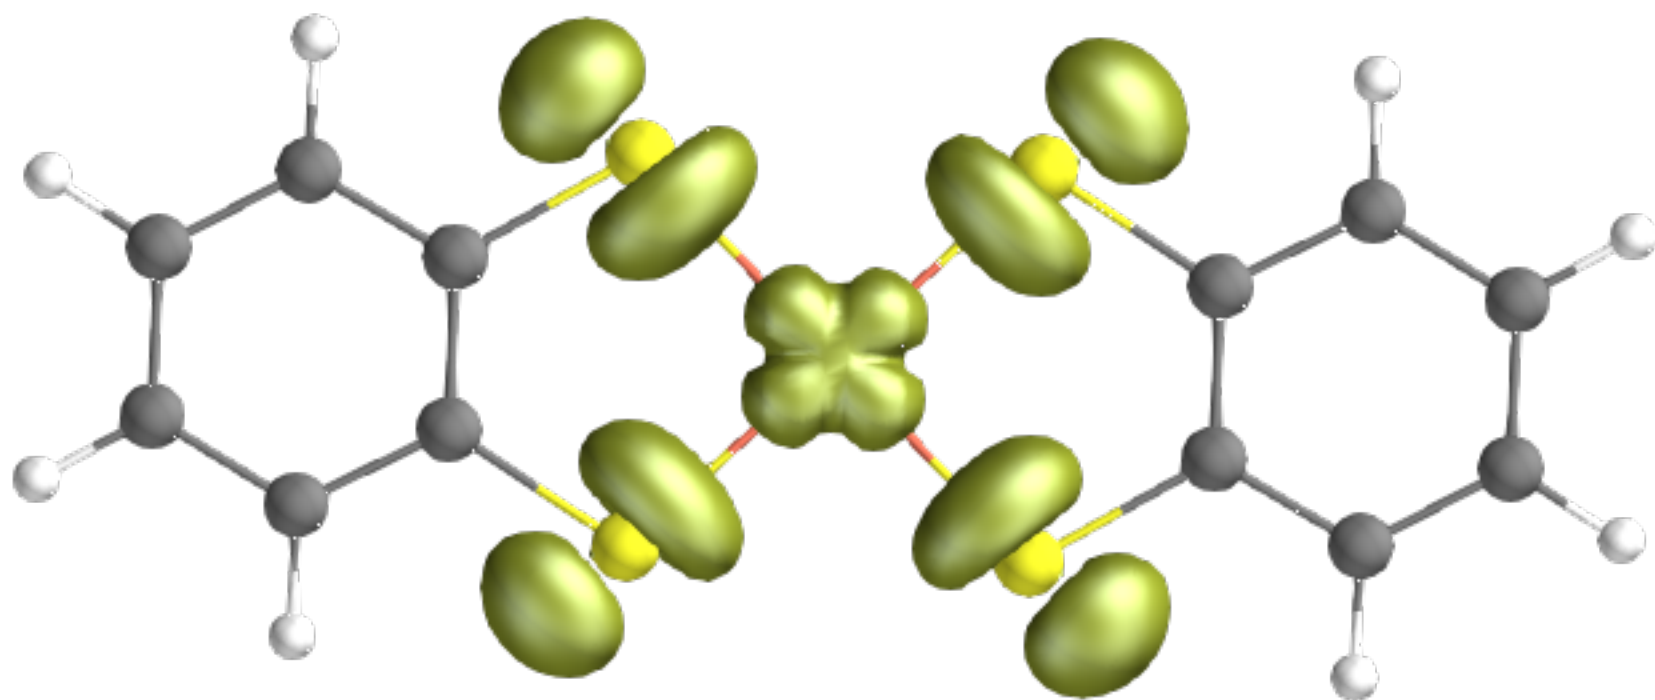

Supplement: d4sc05627b1.zip [file d4sc05627b1.zip]
